# Supplementary material for: PAX6-dependent differentiation landscape of ocular surface epithelium via single-cell RNA sequencing in hiPSC-derived ocular developmental organoid
Source: Springer Nature journal article supplement (doi:10.1038/s42003-025-08643-2), 2025-08-14
Supplement: MOESM1 [file 42003_2025_8643_MOESM1_ESM.pdf]

### **Supplementary Information. Supplementary Fig. 1-3**

**Supplementary Note 1.** Flow cytometry methodology and gating strategy.

**Supplementary Data 1.** Excel file containing lists of cluster-specific genes related to Figs 2, 3, 4, Supplementary Fig. 2, and 3.

**Supplementary Data 2.** Excel file containing lists of cluster-specific regulons, related to Figs 2, 3, 4, and Supplementary Fig. 2.

**Supplementary Data 3.** Excel file containing lists of PAX6-regulated genes identified by SCENIC analysis, classified into PAX6-extended and high-confidence targets. Related to Fig. 2, 3, 4, and Supplementary Fig. 2.

**Supplementary Data 4.** The source data behind the graphs in the paper. Related to Fig. 6b and 6d.

**a**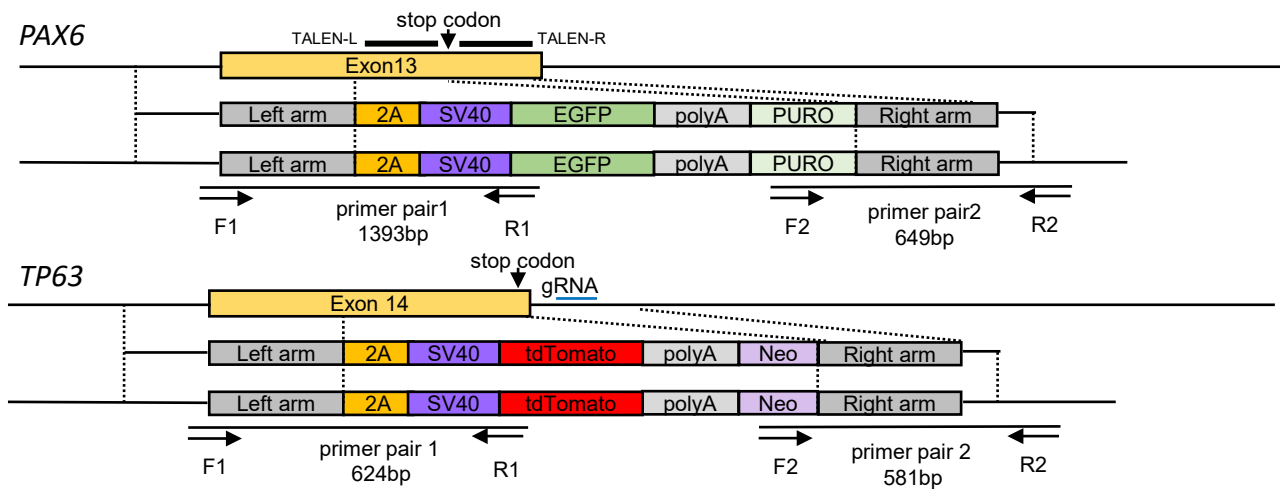**b**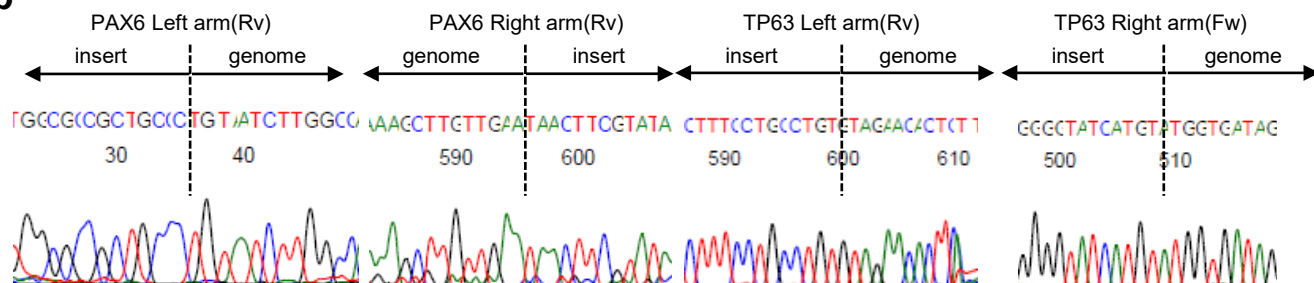**c**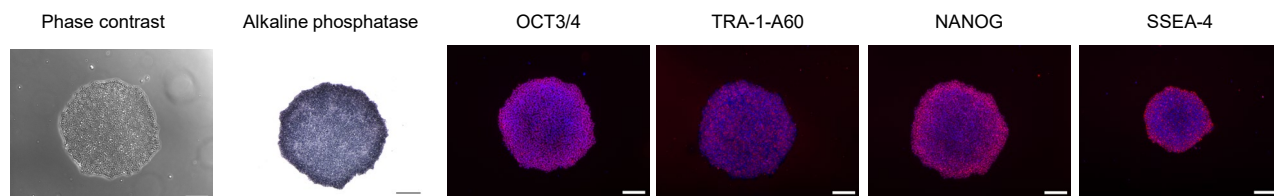**d**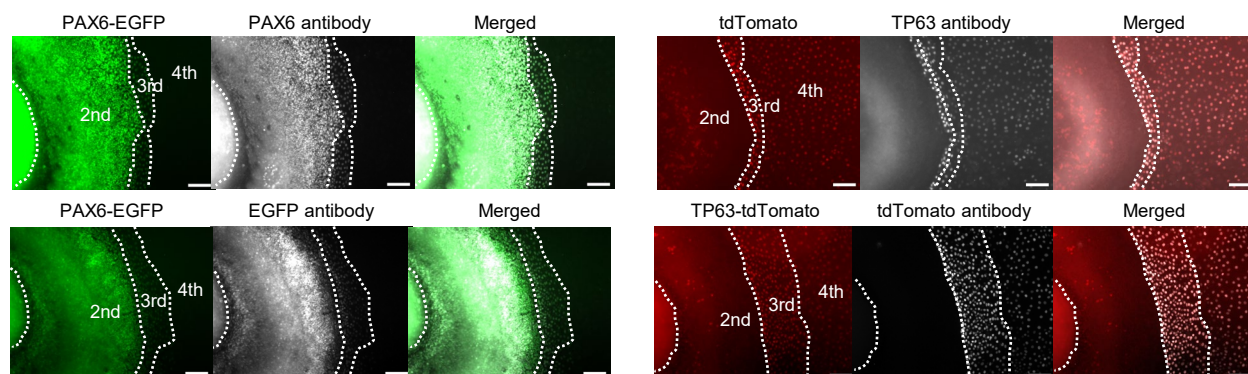

**Supplementary Fig 1. Generation and validation of dual reporter hiPSCs expressing PAX6-EGFP and TP63-tdTomato.**

- (a) Schematic representation of gene targeting strategies for knock-in of EGFP at the PAX6 locus and tdTomato at the TP63 locus. Primer positions used for genotyping are indicated.
- (b) Genomic sequencing confirming precise integration of the reporter constructs at the PAX6 and TP63 loci.
- (c) Characterization of undifferentiated reporter hiPSC colonies by phase-contrast imaging, alkaline phosphatase staining, and immunofluorescence for pluripotency markers OCT3/4, TRA-1-60, NANOG, and SSEA-4.
- (d) Immunofluorescence analysis at 4 weeks of differentiation showing co-localization of PAX6 with EGFP and TP63 with tdTomato across SEAM zones. Representative images are from one biological replicate . Scale bars: 100  $\mu\text{m}$ .

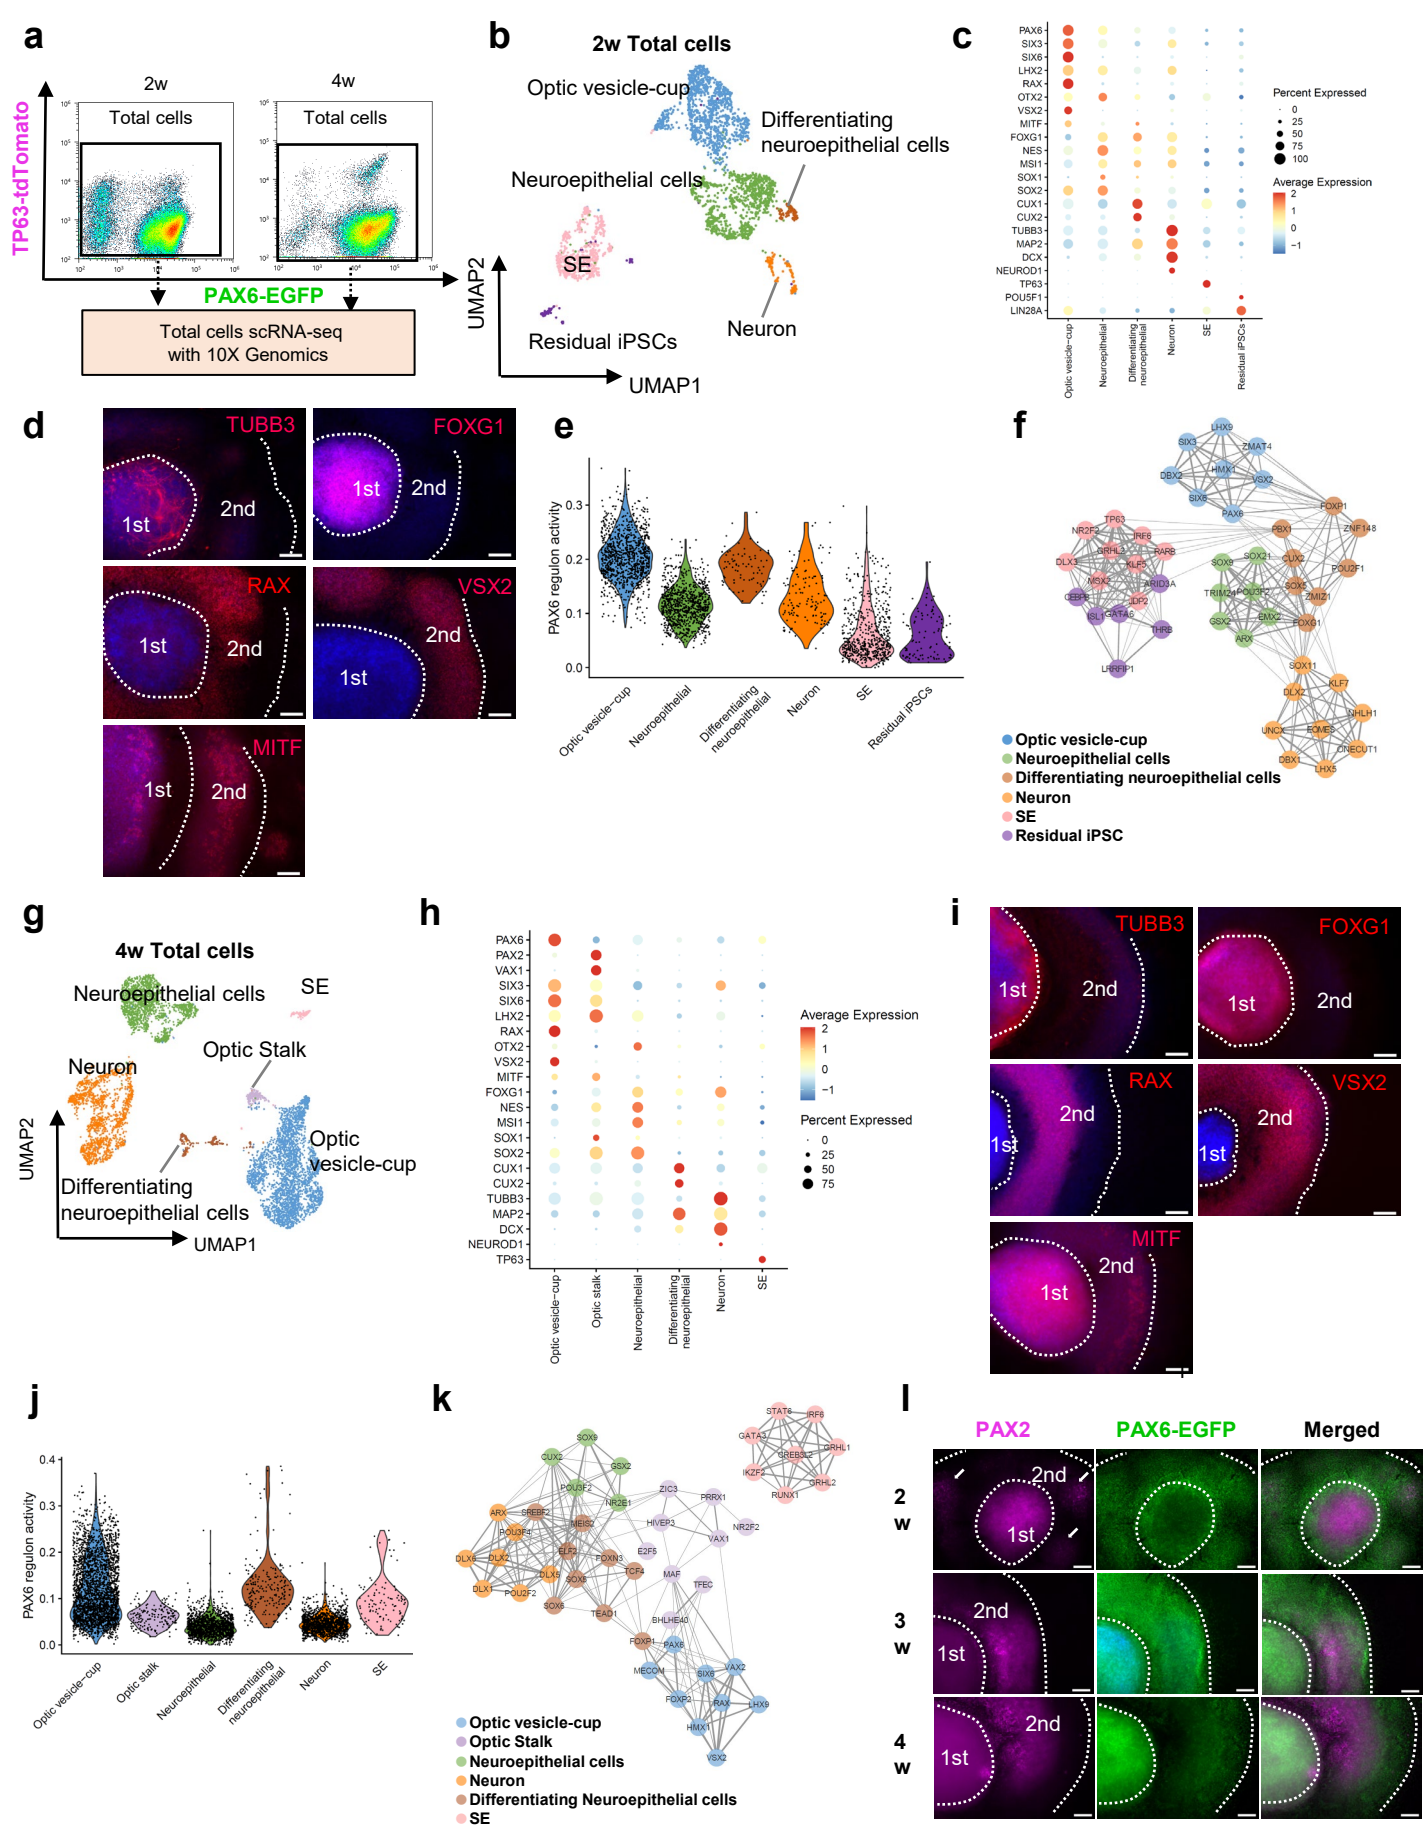

Supplementary Fig. 2

## **Supplementary Fig 2. Ocular development analysis combining SEAM and scRNA-seq**

- (a) Flow cytometry analysis of PAX6-EGFP and TP63-tdTomato expression in total cells at 2 and 4 weeks post differentiation. These cells were used for scRNA-seq.
- (b) UMAP plot of 2-week scRNA-seq data showing clusters including optic vesicle cup, neuroepithelial cells, differentiating neuroepithelial cells, neurons, residual iPSCs, and SE.
- (c) Bubble plot showing expression levels of representative genes in each cluster at 2 weeks.
- (d) Immunofluorescence staining of SEAM zones (1st: zone 1, 2nd: zone 2, 3rd/4th: zone 3/4), showing marker localization across zones using TUBB3, FOXG1, RAX, VSX2, and MITF. Scale bar: 100  $\mu$ m. Representative images are from one biological replicate using two independent colonies.
- (e) Violin plot depicting the PAX6 regulon activity in each cell cluster of Total cells at 2 weeks.
- (f) Network diagram from SCENIC analysis, illustrating the TF regulon activities specific to each cluster within the Total cells at 2 weeks. Node colors and edge thickness represent clusters and coefficients, respectively.
- Abbreviations: SE, Surface Ectoderm; w, week(s).
- (g) UMAP plot of 4-week scRNA-seq data showing clusters including optic vesicle cup, neuroepithelial cells, differentiating neuroepithelial cells, neurons, optic stalk, and SE.
- (h) Bubble plot showing expression levels of representative genes in each cluster at 4 weeks.
- (i) Immunofluorescence staining of SEAM zones (1st: zone 1, 2nd: zone 2) showing marker localization across zones using TUBB3, FOXG1, RAX, VSX2, and MITF. Scale bar: 100  $\mu$ m. Representative images are from one biological replicate.
- (j) Violin plot depicting the PAX6 regulon activity in each cell cluster of total cells at 4 weeks.
- (k) Network diagram from SCENIC analysis illustrating the TF regulon activities specific to each cluster within the total cells at 4 weeks. Node colors and edge thickness represent clusters and correlation coefficients, respectively.
- (l) Immunofluorescence staining showing dynamic expression patterns of PAX2 and PAX6-EGFP in SEAM at 2, 3, and 4 weeks. Co-expression at 2 weeks becomes spatially separated by 4 weeks. Scale bar: 100  $\mu$ m. Representative images are from one biological replicate using two independent colonies. scRNA-seq analyses (b, c, e, f, g, h, j, k) were performed using one biological replicate.

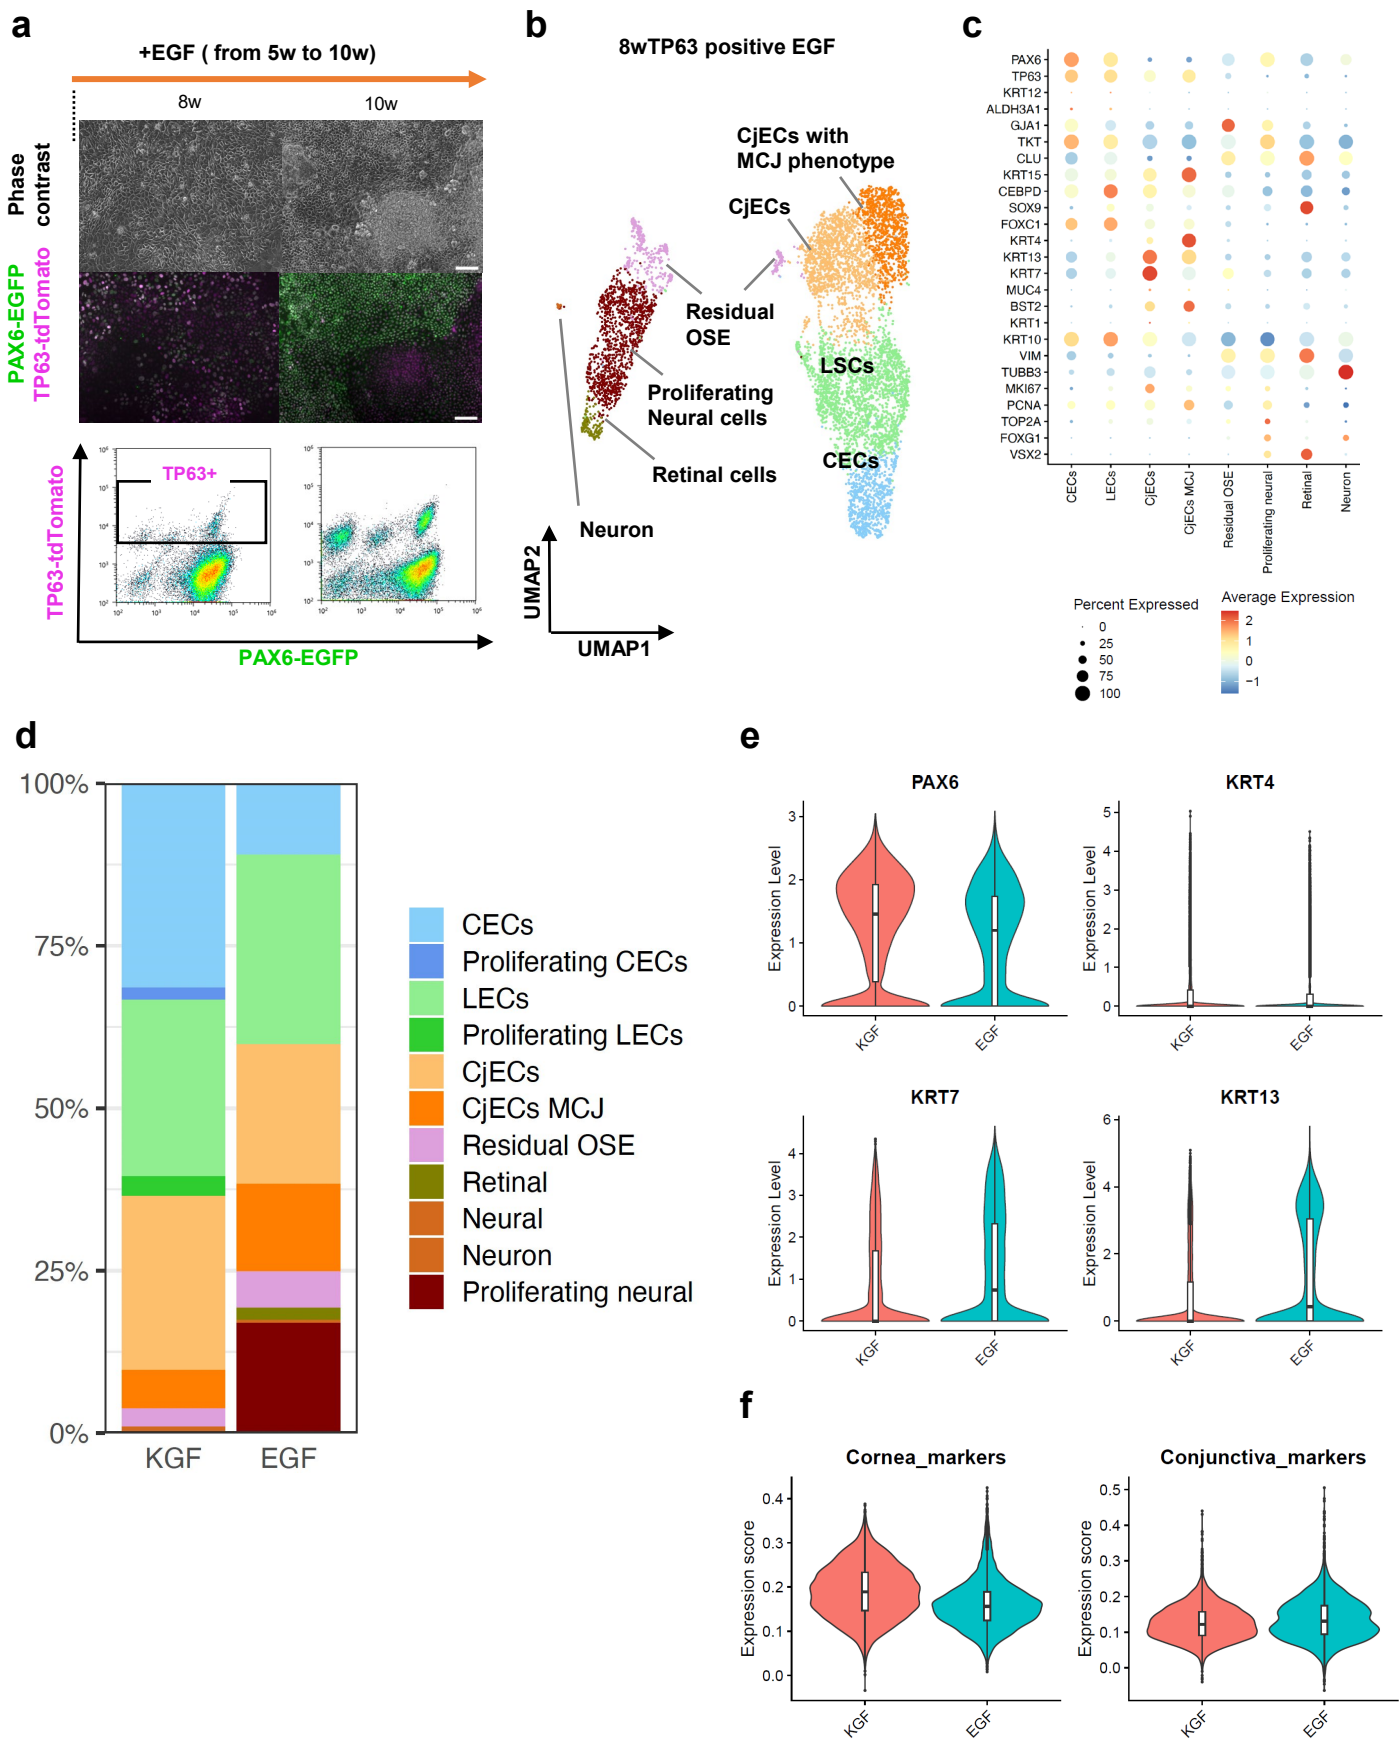

Supplementary Fig. 3

### **Supplementary Figure 3. Single-cell transcriptomic comparison of TP63-positive cells induced by EGF.**

- (a) Sequential imaging of hiPSC differentiation into ocular surface epithelial cells across 8–10 weeks with EGF treatment, with PAX6-EGFP and TP63-tdTomato fluorescence. Flow cytometry plots indicate TP63-positive cell frequency during EGF induction. Representative images are from three independent biological replicates as applicable. Scale bars: 100  $\mu$ m
- (b) UMAP plot of TP63-positive cells at 8 weeks after EGF treatment showing clusters of CECs, LECs, CjECs, CjECs with MCJ phenotype, residual OSE, and retinal, neural, and proliferating neuroepithelial cells.
- (c) Bubble plot showing expression levels of representative genes across clusters.
- (d) Bar plot comparing the proportions of cell types in TP63-positive cells between KGF- and EGF-treated conditions.
- (e) Violin plots of PAX6, KRT4, KRT7, and KRT13 expression in KGF- and EGF-treated cells.
- (f) Violin plots comparing corneal and conjunctival marker scores between KGF- and EGF-treated TP63-positive cells.

scRNA-seq analyses (b, c) were performed using one biological replicate.

## **Supplementary Note 1. Flow cytometry methodology and gating strategy**

### **Sample preparation**

Flow cytometry was performed on differentiated PAX6-EGFP/TP63-tdTomato hiPSCs at 2, 4, 8, and 10 weeks. Cells were dissociated using StemPro™ Accutase™ (Thermo Fisher Scientific), and analyzed and sorted using a SH800S cell sorter (Sony, Tokyo, Japan). Data acquisition and analysis were performed using the instrument's dedicated software.

### **Instrument**

Cell sorter: SH800S (Sony, Tokyo, Japan)

### **Software**

Data acquisition and analysis were conducted using Sony Cell Sorter SH800S software.

### **Cell population abundance**

Sorted cell populations were used to generate epithelial sheets exhibiting clearly distinct phenotypes, supporting the validity of the gating strategy.

### **Gating strategy**

Two gating strategies were applied depending on the experimental context: in some cases, tdTomato-positive cells were further subdivided based on EGFP fluorescence intensity, while in others, the entire tdTomato-positive population was sorted regardless of EGFP expression.

To exclude autofluorescent cells, control iPSCs lacking reporter knock-ins were used to define baseline fluorescence. A 99th percentile cutoff was applied to the control population, and cells in the experimental groups exceeding this threshold were defined as reporter-positive.

Additionally, FSC/SSC-based gating was employed to exclude debris and cell aggregates. Further gating was applied to eliminate diagonally distributed populations likely attributable to autofluorescence, ensuring accurate detection of specific fluorescent signals.
